# Supplementary material for: Creative Interests and Personality
Source: Atypon-hosted journal article supplement (doi:10.1026/0932-4089/a000211), 2016-04-01
Supplement: 0932-4089_a000211_esm1.pdf [file 0932-4089_a000211_esm1.pdf]

**Online Supplement**

Wiernik, B. M., Dilchert, S., & Ones, D. S. (2016). Creative interests and personality: Scientific versus artistic creativity. *Zeitschrift für Arbeits- und Organisationspsychologie*, 60(2). [http://doi.org/ 10.1026/0932-4089/a000211](http://doi.org/10.1026/0932-4089/a000211)

Supplemental Figures

Figure S1. Personality criterion profile patterns for investigative interest scales in Study 1.

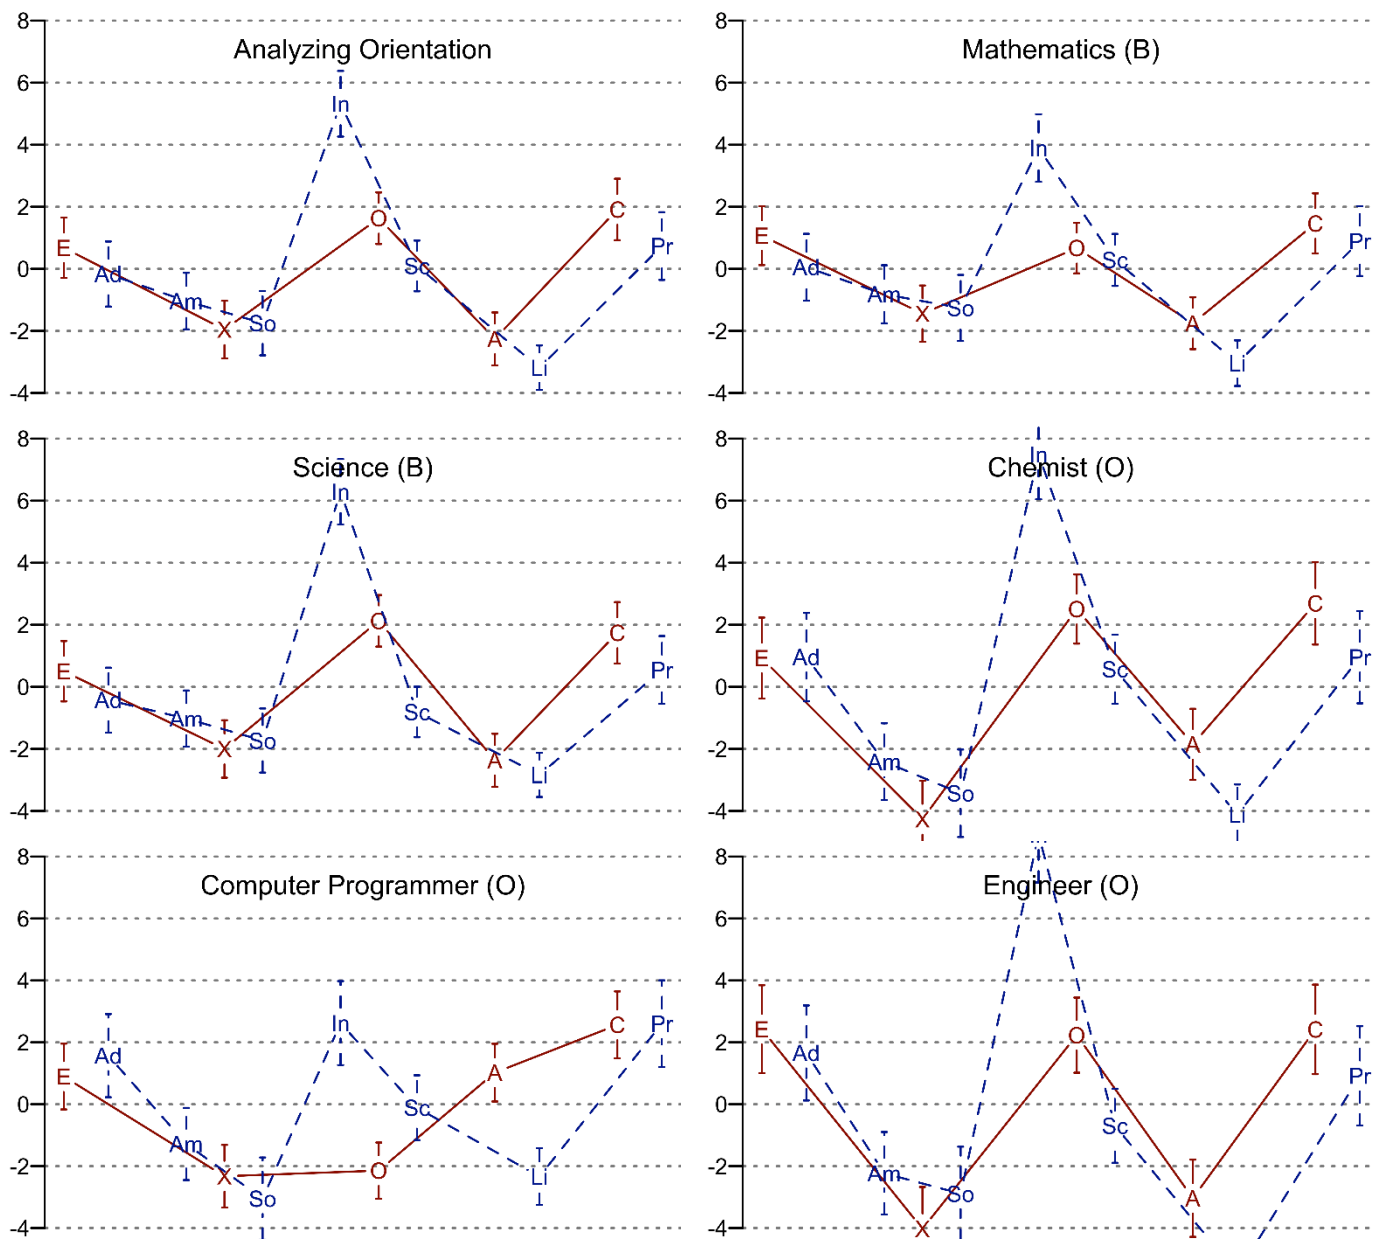

Note. B = Basic interest scales; O = Occupational interest scales; solid red lines indicate NEO PI-R; dashed blue lines indicate HPI; E = Emotional Stability; X = Extraversion; O = Openness; A = Agreeableness; C = Conscientiousness; Ad = Adjustment; Am = Ambition; So = Sociability; In = Intellectance; Sc = School Success; Li = Likeability; Pr = Prudence.

Figure S1, continued.

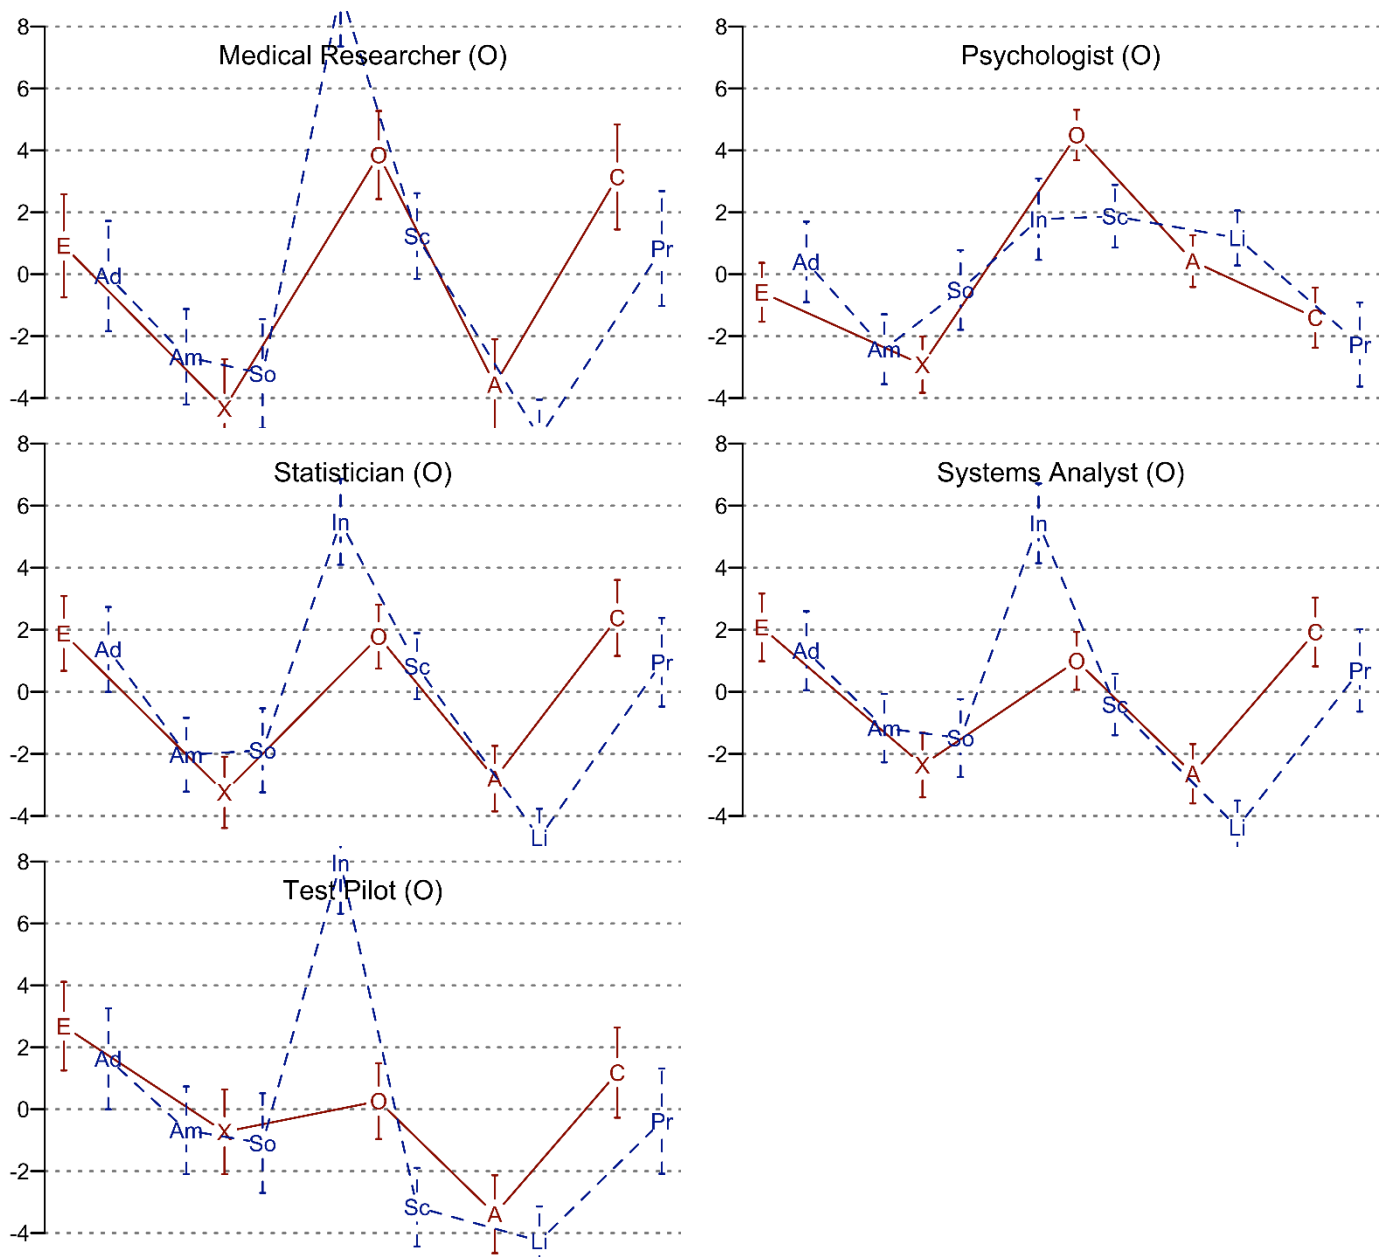

Note. B = Basic interest scales; O = Occupational interest scales; solid red lines indicate NEO PI-R; dashed blue lines indicate HPI; E = Emotional Stability; X = Extraversion; O = Openness; A = Agreeableness; C = Conscientiousness; Ad = Adjustment; Am = Ambition; So = Sociability; In = Intellectance; Sc = School Success; Li = Likeability; Pr = Prudence.

Figure S2. Personality criterion profile patterns for artistic interest scales in Study 1.

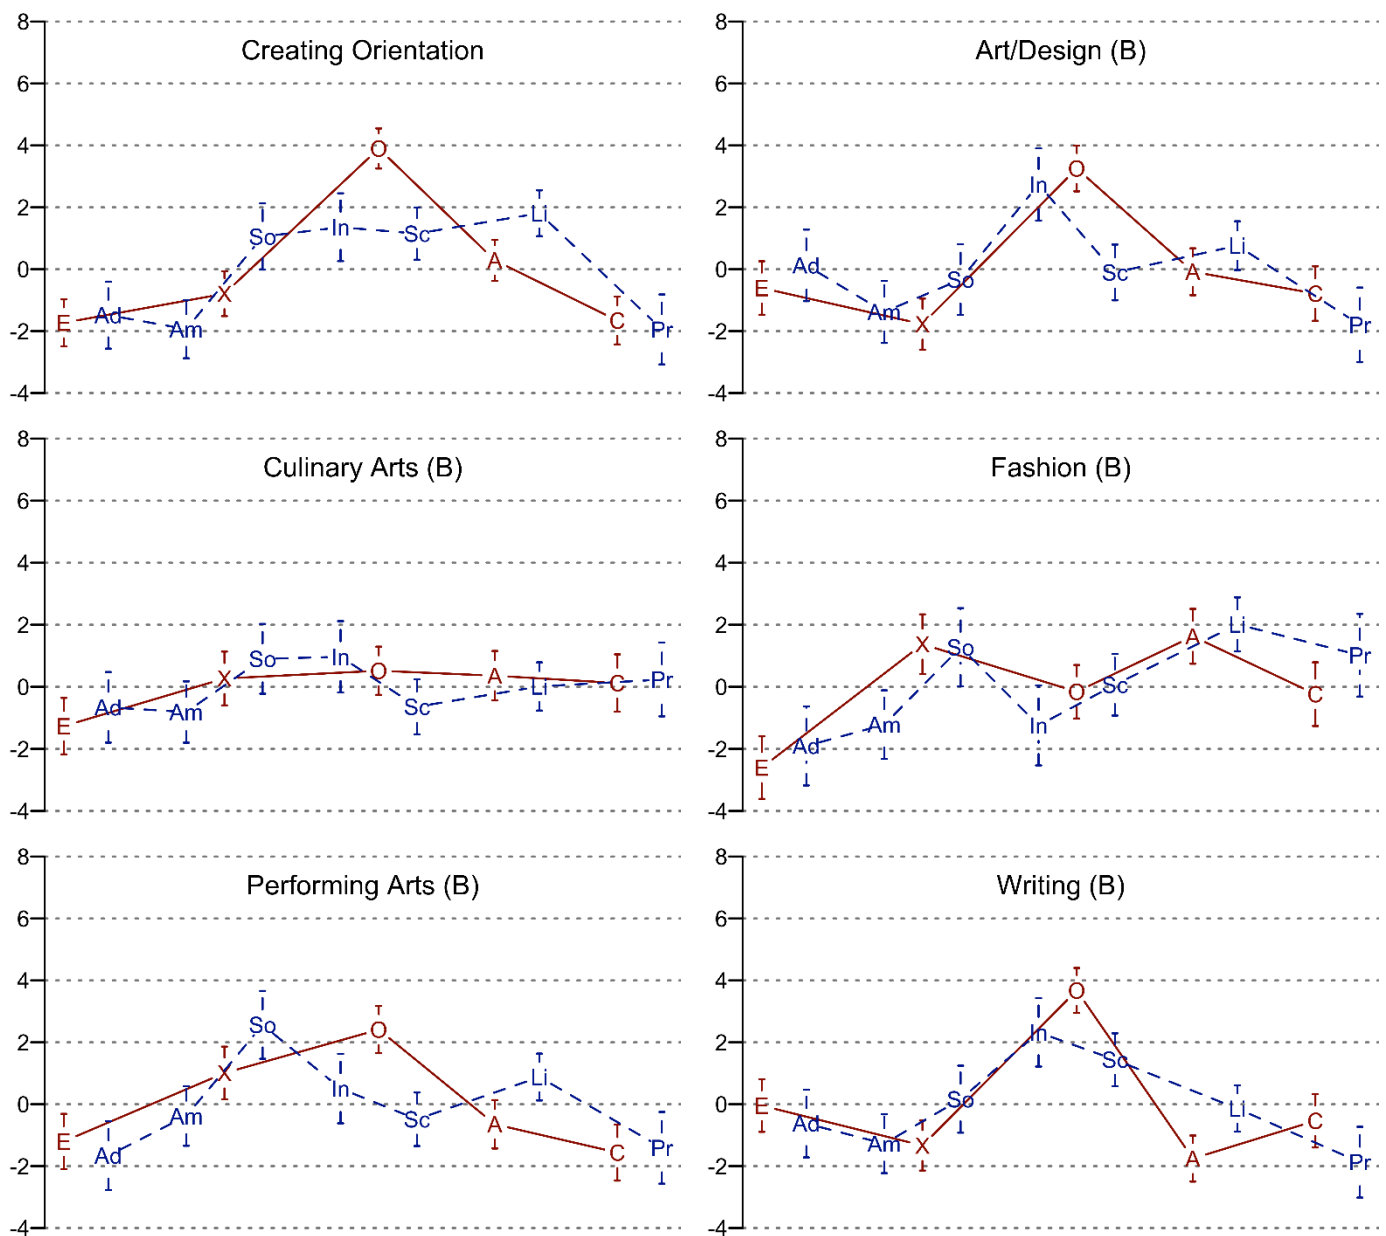

Note. B = Basic interest scales; O = Occupational interest scales; solid red lines indicate NEO PI-R; dashed blue lines indicate HPI; E = Emotional Stability; X = Extraversion; O = Openness; A = Agreeableness; C = Conscientiousness; Ad = Adjustment; Am = Ambition; So = Sociability; In = Intellectance; Sc = School Success; Li = Likeability; Pr = Prudence.

Figure S2, continued.

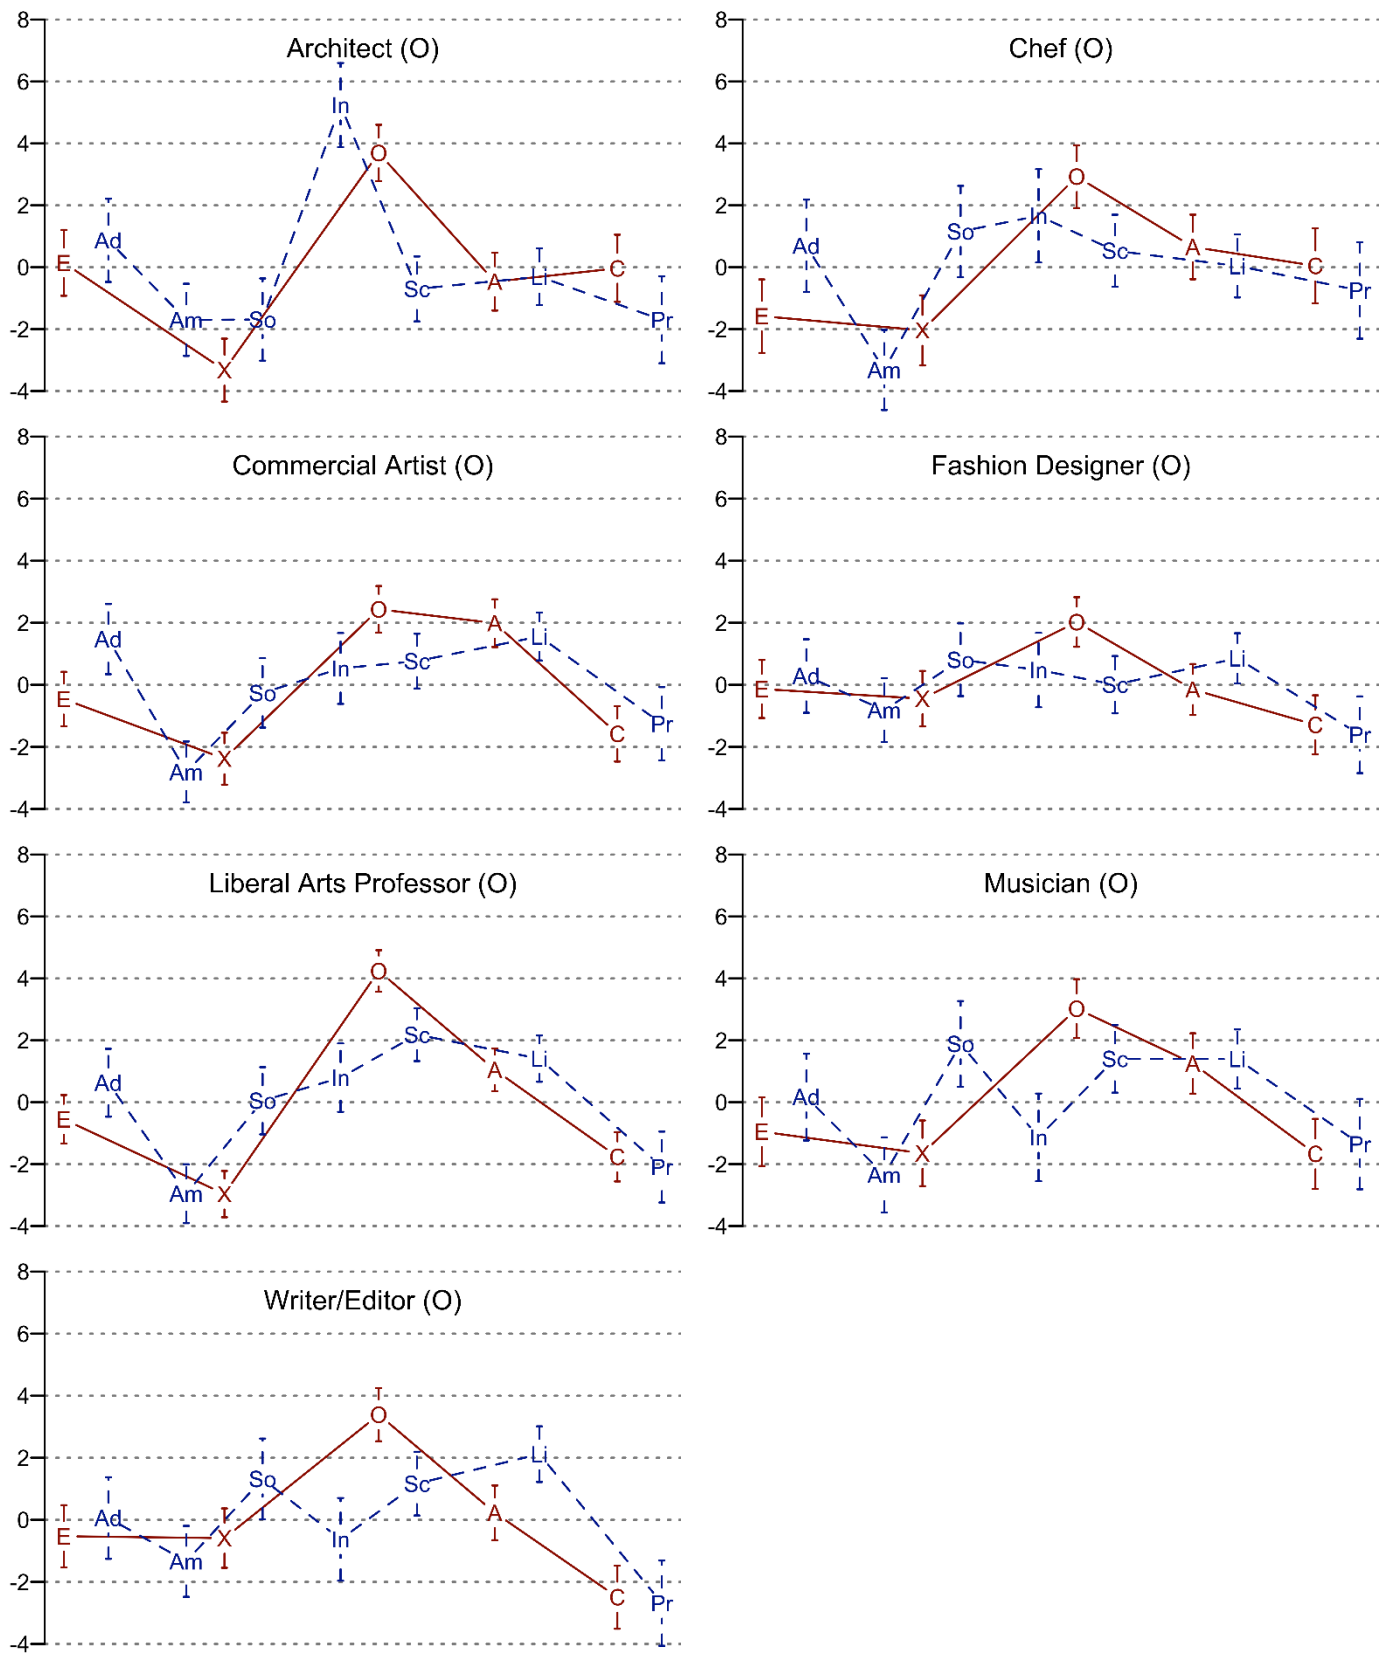

Note. B = Basic interest scales; O = Occupational interest scales; solid red lines indicate NEO PI-R; dashed blue lines indicate HPI; E = Emotional Stability; X = Extraversion; O = Openness; A = Agreeableness; C = Conscientiousness; Ad = Adjustment; Am = Ambition; So = Sociability; In = Intellectance; Sc = School Success; Li = Likeability; Pr = Prudence.

Figure S3. Personality criterion profile patterns for creative vocational interests from meta-analyses and individual samples in Study 2.

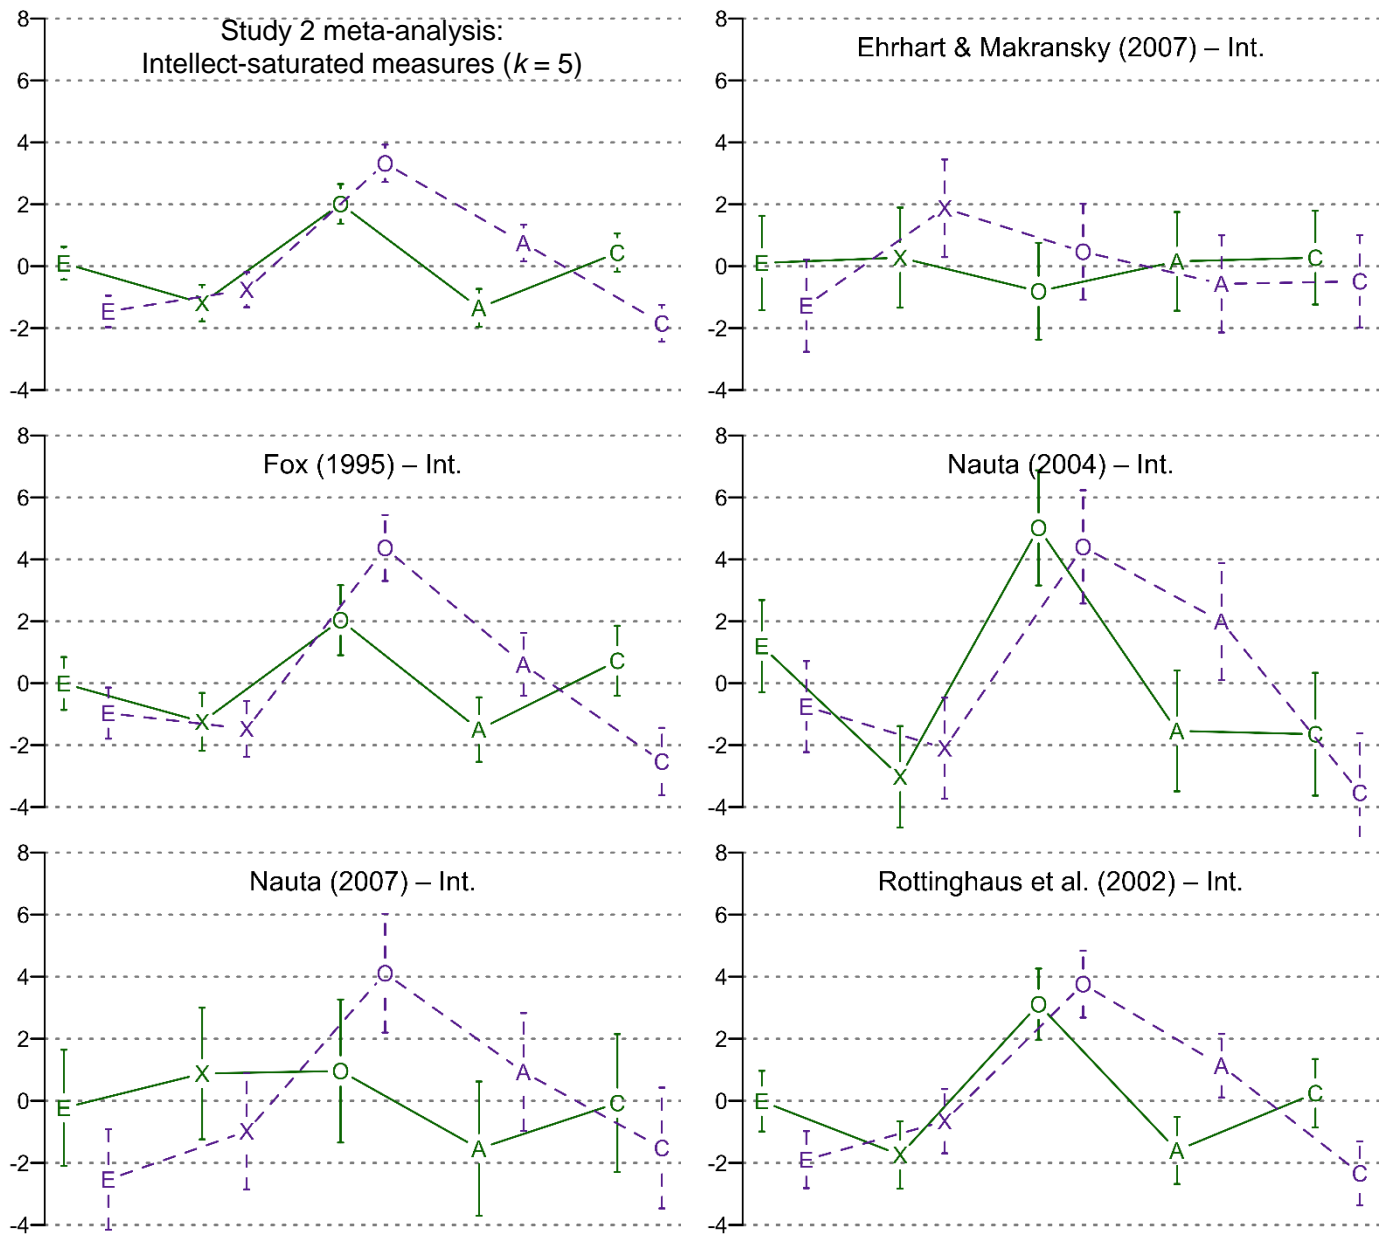

Note. Int. = Openness measure was intellect-saturated; Exp. = Openness measure was experiences-saturated; solid green lines indicate investigative interests; dashed purple lines indicate artistic interests; E = Emotional Stability; X = Extraversion; O = Openness; A = Agreeableness; C = Conscientiousness.

Figure S3, continued.

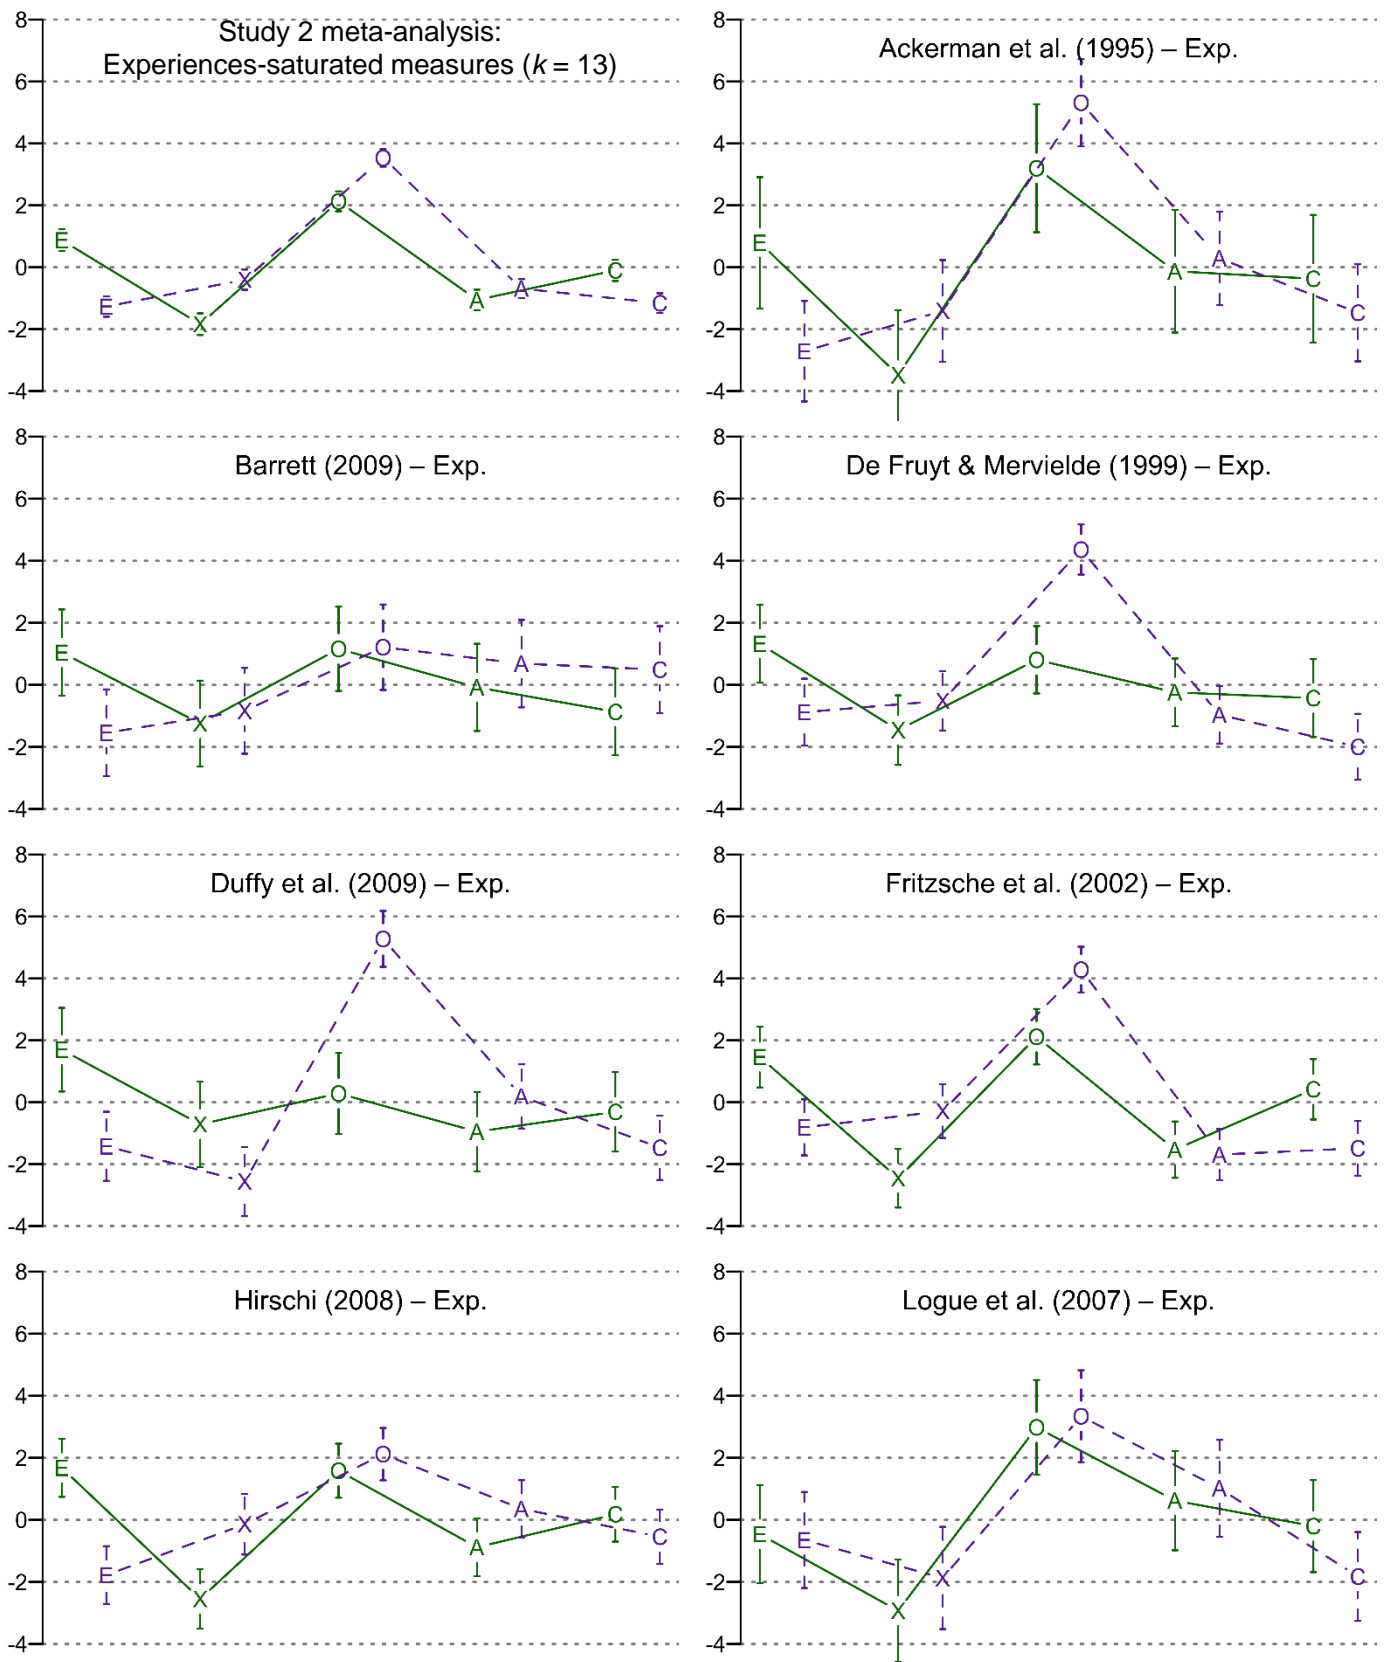

Note. Int. = Openness measure was intellect-saturated; Exp. = Openness measure was experiences-saturated; solid green lines indicate investigative interests; dashed purple lines indicate artistic interests; E = Emotional Stability; X = Extraversion; O = Openness; A = Agreeableness; C = Conscientiousness.

Figure S3, continued.

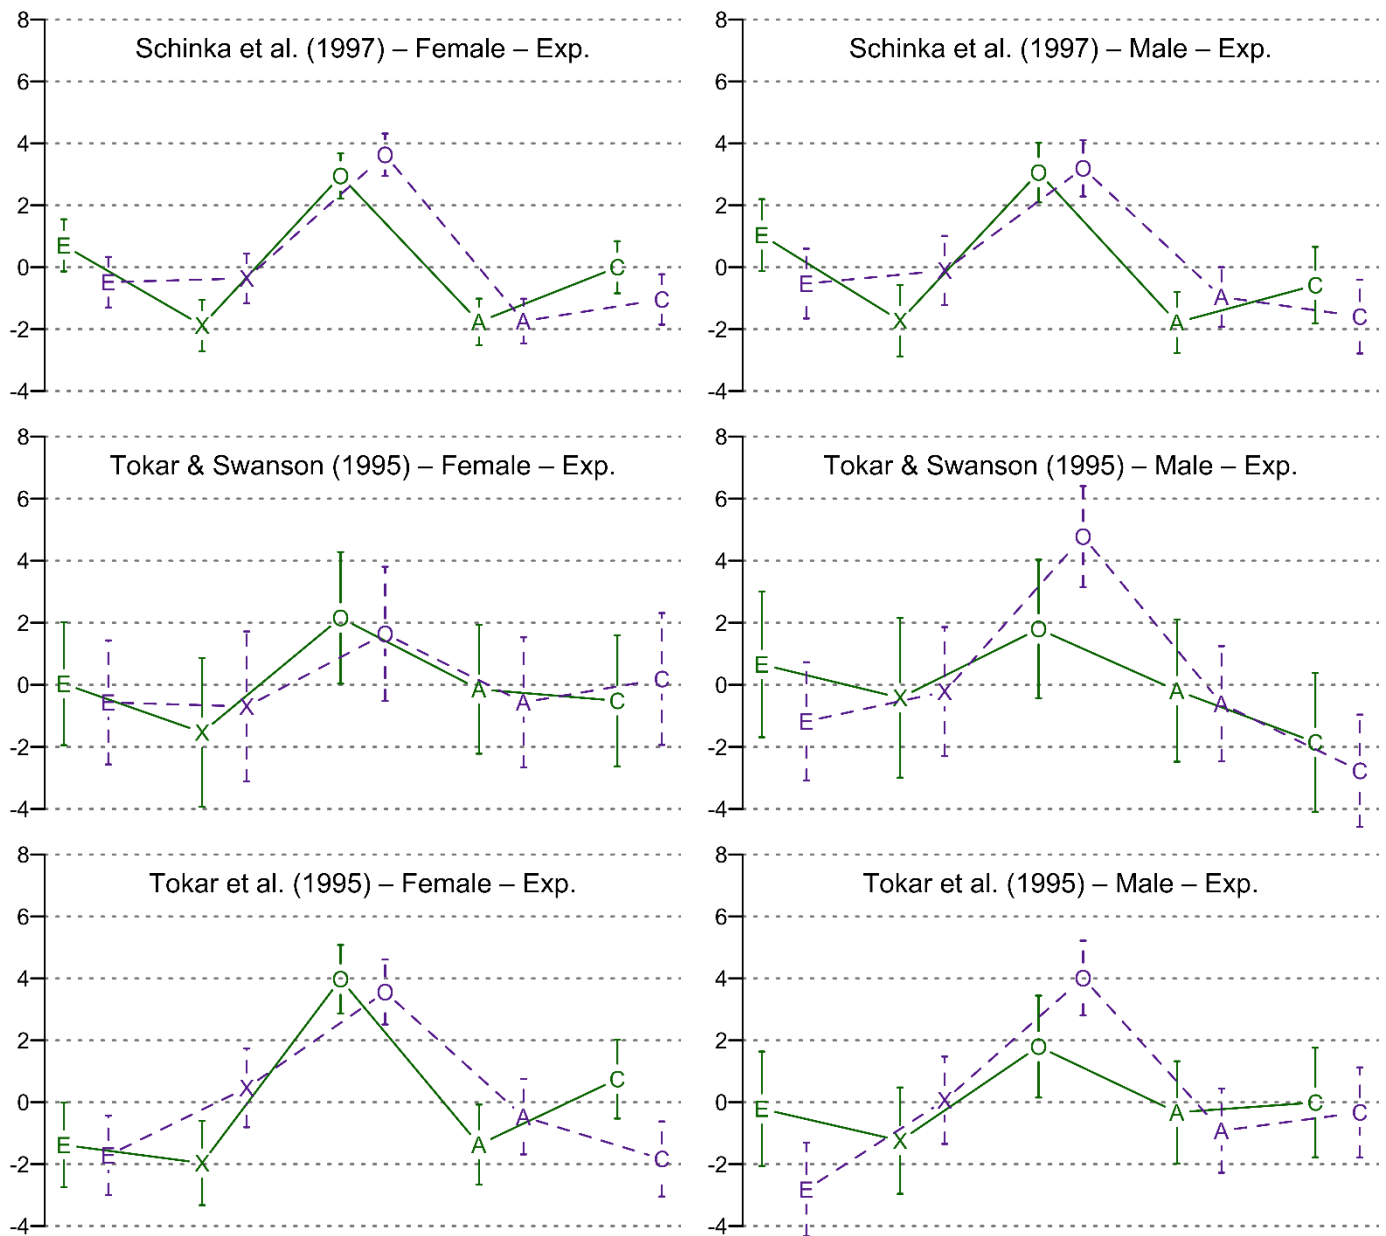

Note. Int. = Openness measure was intellect-saturated; Exp. = Openness measure was experiences-saturated; solid green lines indicate investigative interests; dashed purple lines indicate artistic interests; E = Emotional Stability; X = Extraversion; O = Openness; A = Agreeableness; C = Conscientiousness.



**Supplemental Tables**

*Table S1. Model Summaries for Predicting Investigative Interest Scales*

|                              | Overall    |                       | Profile pattern effect |         |                       |              | Profile level effect |         |                       |              |
|------------------------------|------------|-----------------------|------------------------|---------|-----------------------|--------------|----------------------|---------|-----------------------|--------------|
|                              | <i>R</i>   | <i>R</i> <sup>2</sup> | <i>r</i>               | $\beta$ | <i>r</i> <sup>2</sup> | $\Delta R^2$ | <i>r</i>             | $\beta$ | <i>r</i> <sup>2</sup> | $\Delta R^2$ |
| <i>Analyzing Orientation</i> |            |                       |                        |         |                       |              |                      |         |                       |              |
| NEO PI-R                     | <b>.30</b> | .09                   | <b>.30</b>             | .30     | .09                   | .09          | <b>.03</b>           | .02     | .00                   | .00          |
| HPI                          | <b>.54</b> | .30                   | <b>.48</b>             | .55     | .23                   | .28          | <b>.12</b>           | .27     | .02                   | .07          |
| <i>Basic interest scales</i> |            |                       |                        |         |                       |              |                      |         |                       |              |
| Mathematics                  |            |                       |                        |         |                       |              |                      |         |                       |              |
| NEO PI-R                     | <b>.25</b> | .06                   | <b>.24</b>             | .24     | .06                   | .06          | <b>.07</b>           | .06     | .00                   | .00          |
| HPI                          | <b>.45</b> | .21                   | <b>.41</b>             | .47     | .17                   | .20          | <b>.07</b>           | .21     | .00                   | .04          |
| Science                      |            |                       |                        |         |                       |              |                      |         |                       |              |
| NEO PI-R                     | <b>.33</b> | .11                   | <b>.31</b>             | .31     | .10                   | .10          | <b>.12</b>           | -.12    | .01                   | .01          |
| HPI                          | <b>.56</b> | .31                   | <b>.49</b>             | .56     | .24                   | .30          | <b>.12</b>           | .27     | .02                   | .07          |
| <i>Occupational scales</i>   |            |                       |                        |         |                       |              |                      |         |                       |              |
| Chemist                      |            |                       |                        |         |                       |              |                      |         |                       |              |
| NEO PI-R                     | <b>.31</b> | .10                   | <b>.31</b>             | .31     | .10                   | .09          | <b>.07</b>           | .05     | .00                   | .00          |
| HPI                          | <b>.53</b> | .28                   | <b>.52</b>             | .55     | .27                   | .28          | <b>.04</b>           | .09     | .00                   | .01          |
| Computer Programmer          |            |                       |                        |         |                       |              |                      |         |                       |              |
| NEO PI-R                     | <b>.48</b> | .23                   | <b>.40</b>             | .38     | .16                   | .14          | <b>.30</b>           | .26     | .09                   | .07          |
| HPI                          | <b>.45</b> | .20                   | <b>.43</b>             | .39     | .19                   | .14          | <b>.25</b>           | .12     | .06                   | .01          |
| Engineer                     |            |                       |                        |         |                       |              |                      |         |                       |              |
| NEO PI-R                     | <b>.31</b> | .10                   | <b>.28</b>             | .28     | .08                   | .08          | <b>.15</b>           | .14     | .02                   | .02          |
| HPI                          | <b>.57</b> | .33                   | <b>.55</b>             | .60     | .30                   | .33          | <b>.01</b>           | .17     | .00                   | .03          |
| Medical Researcher           |            |                       |                        |         |                       |              |                      |         |                       |              |
| NEO PI-R                     | <b>.29</b> | .09                   | <b>.29</b>             | .29     | .09                   | .09          | <b>.03</b>           | -.01    | .00                   | .00          |
| HPI                          | <b>.55</b> | .31                   | <b>.50</b>             | .57     | .25                   | .30          | <b>.08</b>           | .24     | .01                   | .05          |
| Psychologist                 |            |                       |                        |         |                       |              |                      |         |                       |              |
| NEO PI-R                     | <b>.51</b> | .26                   | <b>.49</b>             | .50     | .24                   | .25          | <b>.13</b>           | .16     | .02                   | .02          |
| HPI                          | <b>.24</b> | .06                   | <b>.24</b>             | .24     | .06                   | .06          | <b>.04</b>           | .04     | .00                   | .00          |
| Statistician                 |            |                       |                        |         |                       |              |                      |         |                       |              |
| NEO PI-R                     | <b>.37</b> | .13                   | <b>.34</b>             | .33     | .11                   | .11          | <b>.15</b>           | .15     | .02                   | .02          |
| HPI                          | <b>.53</b> | .28                   | <b>.51</b>             | .55     | .26                   | .28          | <b>.01</b>           | .15     | .00                   | .02          |
| Systems Analyst              |            |                       |                        |         |                       |              |                      |         |                       |              |
| NEO PI-R                     | <b>.38</b> | .15                   | <b>.33</b>             | .33     | .11                   | .11          | <b>.20</b>           | .20     | .04                   | .04          |
| HPI                          | <b>.50</b> | .25                   | <b>.50</b>             | .51     | .25                   | .25          | <b>.06</b>           | .05     | .00                   | .00          |
| Test Pilot                   |            |                       |                        |         |                       |              |                      |         |                       |              |
| NEO PI-R                     | <b>.30</b> | .09                   | <b>.24</b>             | .26     | .06                   | .07          | <b>.15</b>           | .18     | .02                   | .03          |
| HPI                          | <b>.48</b> | .23                   | <b>.48</b>             | .48     | .23                   | .23          | <b>.02</b>           | .01     | .00                   | .00          |

*Note.* Sample sizes for correlations between interest criteria and profile level and pattern effects were *N* = 521 (NEO PI-R) and 520 (HPI). *R* = multiple correlation for pattern effect and level effect with interest criteria; *R*<sup>2</sup> = amount of variance accounted for by both effects;  $\beta$  = standardized regression coefficient;  $\Delta R^2$  = incremental amount of variance accounted for by one effect over the other; NEO PI-R = NEO Personality Inventory-Revised; HPI = Hogan Personality Inventory.

Table S2. Model Summaries for Predicting Artistic Interest Scales

|                               | Overall    |                       | Profile pattern effect |         |                       |              | Profile level effect |         |                       |              |
|-------------------------------|------------|-----------------------|------------------------|---------|-----------------------|--------------|----------------------|---------|-----------------------|--------------|
|                               | <i>R</i>   | <i>R</i> <sup>2</sup> | <i>r</i>               | $\beta$ | <i>r</i> <sup>2</sup> | $\Delta R^2$ | <i>r</i>             | $\beta$ | <i>r</i> <sup>2</sup> | $\Delta R^2$ |
| <i>Creating Orientation</i>   |            |                       |                        |         |                       |              |                      |         |                       |              |
| NEO PI-R                      | <b>.59</b> | .34                   | <b>.52</b>             | .52     | .27                   | .27          | <b>.26</b>           | .28     | .07                   | .08          |
| HPI                           | <b>.41</b> | .17                   | <b>.37</b>             | .36     | .14                   | .13          | <b>.18</b>           | .17     | .03                   | .03          |
| <i>Basic interest scales</i>  |            |                       |                        |         |                       |              |                      |         |                       |              |
| <i>Art/Design</i>             |            |                       |                        |         |                       |              |                      |         |                       |              |
| NEO PI-R                      | <b>.42</b> | .18                   | <b>.39</b>             | .40     | .15                   | .16          | <b>.14</b>           | .16     | .02                   | .03          |
| HPI                           | <b>.25</b> | .06                   | <b>.24</b>             | .25     | .06                   | .06          | <b>.01</b>           | .03     | .00                   | .00          |
| <i>Performing Arts</i>        |            |                       |                        |         |                       |              |                      |         |                       |              |
| NEO PI-R                      | <b>.42</b> | .17                   | <b>.37</b>             | .37     | .14                   | .13          | <b>.20</b>           | .19     | .04                   | .04          |
| HPI                           | <b>.37</b> | .14                   | <b>.32</b>             | .31     | .10                   | .10          | <b>.21</b>           | .19     | .04                   | .04          |
| <i>Writing</i>                |            |                       |                        |         |                       |              |                      |         |                       |              |
| NEO PI-R                      | <b>.45</b> | .20                   | <b>.42</b>             | .41     | .17                   | .17          | <b>.19</b>           | .18     | .03                   | .03          |
| HPI                           | <b>.41</b> | .17                   | <b>.33</b>             | .33     | .11                   | .11          | <b>.23</b>           | .24     | .05                   | .06          |
| <i>Culinary Arts</i>          |            |                       |                        |         |                       |              |                      |         |                       |              |
| NEO PI-R                      | <b>.18</b> | .03                   | <b>.10</b>             | .12     | .01                   | .01          | <b>.13</b>           | .15     | .02                   | .02          |
| HPI                           | <b>.02</b> | .00                   | <b>.01</b>             | .00     | .00                   | .00          | <b>.02</b>           | .02     | .00                   | .00          |
| <i>Fashion</i>                |            |                       |                        |         |                       |              |                      |         |                       |              |
| NEO PI-R                      | <b>.26</b> | .07                   | <b>.24</b>             | .25     | .06                   | .06          | <b>.09</b>           | .12     | .01                   | .01          |
| HPI                           | <b>.28</b> | .08                   | <b>.28</b>             | .28     | .08                   | .08          | <b>.02</b>           | -.02    | .00                   | .00          |
| <i>Occupational scales</i>    |            |                       |                        |         |                       |              |                      |         |                       |              |
| <i>Architect</i>              |            |                       |                        |         |                       |              |                      |         |                       |              |
| NEO PI-R                      | <b>.37</b> | .14                   | <b>.37</b>             | .37     | .13                   | .14          | <b>.04</b>           | .07     | .00                   | .00          |
| HPI                           | <b>.33</b> | .11                   | <b>.33</b>             | .33     | .11                   | .11          | <b>.03</b>           | .01     | .00                   | .00          |
| <i>Chef</i>                   |            |                       |                        |         |                       |              |                      |         |                       |              |
| NEO PI-R                      | <b>.26</b> | .07                   | <b>.26</b>             | .27     | .07                   | .07          | <b>.02</b>           | .06     | .00                   | .00          |
| HPI                           | <b>.22</b> | .05                   | <b>.22</b>             | .22     | .05                   | .05          | <b>.04</b>           | .03     | .00                   | .00          |
| <i>Commercial Artist</i>      |            |                       |                        |         |                       |              |                      |         |                       |              |
| NEO PI-R                      | <b>.43</b> | .18                   | <b>.42</b>             | .42     | .18                   | .18          | <b>.09</b>           | -.07    | .01                   | .00          |
| HPI                           | <b>.32</b> | .10                   | <b>.29</b>             | .28     | .08                   | .08          | <b>.16</b>           | .14     | .02                   | .02          |
| <i>Fashion Designer</i>       |            |                       |                        |         |                       |              |                      |         |                       |              |
| NEO PI-R                      | <b>.21</b> | .05                   | <b>.21</b>             | .21     | .05                   | .05          | <b>.00</b>           | -.01    | .00                   | .00          |
| HPI                           | <b>.10</b> | .01                   | <b>.06</b>             | .09     | .00                   | .01          | <b>.06</b>           | .09     | .00                   | .01          |
| <i>Liberal Arts Professor</i> |            |                       |                        |         |                       |              |                      |         |                       |              |
| NEO PI-R                      | <b>.58</b> | .33                   | <b>.56</b>             | .57     | .31                   | .32          | <b>.09</b>           | .14     | .01                   | .02          |
| HPI                           | <b>.34</b> | .12                   | <b>.34</b>             | .34     | .11                   | .11          | <b>.03</b>           | .03     | .00                   | .00          |
| <i>Musician</i>               |            |                       |                        |         |                       |              |                      |         |                       |              |
| NEO PI-R                      | <b>.36</b> | .13                   | <b>.36</b>             | .35     | .13                   | .12          | <b>.05</b>           | .03     | .00                   | .00          |
| HPI                           | <b>.28</b> | .08                   | <b>.23</b>             | .24     | .05                   | .06          | <b>.14</b>           | .15     | .02                   | .02          |
| <i>Writer/Editor</i>          |            |                       |                        |         |                       |              |                      |         |                       |              |
| NEO PI-R                      | <b>.45</b> | .20                   | <b>.42</b>             | .42     | .18                   | .18          | <b>.15</b>           | .15     | .02                   | .02          |
| HPI                           | <b>.27</b> | .07                   | <b>.26</b>             | .28     | .07                   | .07          | <b>.02</b>           | .07     | .00                   | .00          |

*Note.* Sample sizes for correlations between interest criteria and profile level and pattern effects were *N* = 521 (NEO PI-R) and 520 (HPI). *R* = multiple correlation for pattern effect and level effect with interest criteria; *R*<sup>2</sup> = amount of variance accounted for by both effects;  $\beta$  = standardized regression coefficient;  $\Delta R^2$  = incremental amount of variance accounted for by one effect over the other; NEO PI-R = NEO Personality Inventory-Revised; HPI = Hogan Personality Inventory.

Table S3. Sample Descriptions and Model Summaries for Study 2 Profile Analyses Predicting Investigative and Artistic Interests

| Sample description                                             | Interest measure                                                | Personality measure | Openness aspect | N    | Overall    |                | Profile pattern effect |     |                |                 | Profile level effect |     |                |                 |
|----------------------------------------------------------------|-----------------------------------------------------------------|---------------------|-----------------|------|------------|----------------|------------------------|-----|----------------|-----------------|----------------------|-----|----------------|-----------------|
|                                                                |                                                                 |                     |                 |      | R          | R <sup>2</sup> | r                      | β   | r <sup>2</sup> | ΔR <sup>2</sup> | r                    | β   | r <sup>2</sup> | ΔR <sup>2</sup> |
| Meta-analytic results: Intellect-saturated measures (k = 5)    |                                                                 |                     | Int             |      |            |                |                        |     |                |                 |                      |     |                |                 |
|                                                                | <i>Investigative interests</i>                                  |                     |                 | 1302 | <b>.24</b> | .06            | <b>.22</b>             | .21 | .05            | .04             | <b>.12</b>           | .10 | .01            | .01             |
|                                                                | <i>Artistic interests</i>                                       |                     |                 | 1302 | <b>.35</b> | .12            | <b>.35</b>             | .34 | .12            | .11             | <b>.13</b>           | .06 | .02            | .00             |
| Meta-analytic results: Experiences-saturated measures (k = 13) |                                                                 |                     | Exp             |      |            |                |                        |     |                |                 |                      |     |                |                 |
|                                                                | <i>Investigative interests</i>                                  |                     |                 | 3601 | <b>.28</b> | .08            | <b>.23</b>             | .25 | .05            | .06             | <b>.13</b>           | .16 | .02            | .03             |
|                                                                | <i>Artistic interests</i>                                       |                     |                 | 3601 | <b>.45</b> | .20            | <b>.38</b>             | .41 | .15            | .17             | <b>.19</b>           | .24 | .03            | .06             |
| Ackerman et al. (1995)                                         | Adult paid volunteers from a university community               | UNIACT              | NEO PI-R        |      |            |                |                        |     |                |                 |                      |     |                |                 |
|                                                                | <i>Investigative interests</i>                                  |                     |                 | 93   | <b>.37</b> | .14            | <b>.34</b>             | .36 | .11            | .13             | <b>.11</b>           | .16 | .01            | .02             |
|                                                                | <i>Artistic interests</i>                                       |                     |                 | 93   | <b>.71</b> | .50            | <b>.65</b>             | .67 | .43            | .45             | <b>.23</b>           | .27 | .05            | .07             |
| Barrett (2009)                                                 | Undergraduate university students in psychology classes         | SDS                 | IPIP NEO        |      |            |                |                        |     |                |                 |                      |     |                |                 |
|                                                                | <i>Investigative interests</i>                                  |                     |                 | 194  | <b>.26</b> | .07            | <b>.22</b>             | .22 | .05            | .05             | <b>.15</b>           | .15 | .02            | .02             |
|                                                                | <i>Artistic interests</i>                                       |                     |                 | 194  | <b>.25</b> | .06            | <b>.25</b>             | .25 | .06            | .06             | <b>.03</b>           | .00 | .00            | .00             |
| De Fruyt & Mervielde (1999)                                    | Employed recent university graduates in a diverse set of fields | SDS/<br>BZO95       | NEO PI-R        |      |            |                |                        |     |                |                 |                      |     |                |                 |
|                                                                | <i>Investigative interests</i>                                  |                     |                 | 335  | <b>.20</b> | .04            | <b>.16</b>             | .17 | .03            | .03             | <b>.11</b>           | .12 | .01            | .01             |
|                                                                | <i>Artistic interests</i>                                       |                     |                 | 355  | <b>.55</b> | .31            | <b>.51</b>             | .56 | .26            | .30             | <b>.10</b>           | .22 | .01            | .05             |
| Duffy et al. (2009)                                            | First-year medical students in a combined BS/MD degree program  | SII                 | NEO PI-R        |      |            |                |                        |     |                |                 |                      |     |                |                 |
|                                                                | <i>Investigative interests</i>                                  |                     |                 | 282  | <b>.24</b> | .06            | <b>.15</b>             | .15 | .02            | .02             | <b>.19</b>           | .19 | .04            | .04             |
|                                                                | <i>Artistic interests</i>                                       |                     |                 | 282  | <b>.62</b> | .38            | <b>.53</b>             | .56 | .28            | .31             | <b>.26</b>           | .33 | .07            | .10             |

|                              | Sample description                                          | Interest measure | Personality measure | Openness aspect | N   | Overall    |                | Profile pattern effect |     |                |                 | Profile level effect |      |                |                 |
|------------------------------|-------------------------------------------------------------|------------------|---------------------|-----------------|-----|------------|----------------|------------------------|-----|----------------|-----------------|----------------------|------|----------------|-----------------|
|                              |                                                             |                  |                     |                 |     | R          | R <sup>2</sup> | r                      | β   | r <sup>2</sup> | ΔR <sup>2</sup> | r                    | β    | r <sup>2</sup> | ΔR <sup>2</sup> |
| Ehrhart and Makransky (2007) | Upper level undergraduate students in psychology classes    | COPS-P           | IPIP Big Five       | Int             | 178 | <b>.15</b> | .02            | <b>.09</b>             | .08 | .01            | .01             | <b>-.13</b>          | -.12 | .02            | .01             |
|                              | <i>Science interests</i>                                    |                  |                     |                 |     |            |                |                        |     |                |                 |                      |      |                |                 |
|                              | <i>Artistic interests</i>                                   |                  |                     |                 | 178 | <b>.22</b> | .05            | <b>.22</b>             | .22 | .05            | .05             | <b>-.03</b>          | -.05 | .00            | .00             |
| Fox (1995)                   | Undergraduate students in a variety of fields               | SII              | ACL                 | Int             | 538 | <b>.27</b> | .07            | <b>.23</b>             | .21 | .05            | .04             | <b>.18</b>           | .14  | .03            | .02             |
|                              | <i>Investigative interests</i>                              |                  |                     |                 |     |            |                |                        |     |                |                 |                      |      |                |                 |
|                              | <i>Artistic interests</i>                                   |                  |                     |                 | 538 | <b>.36</b> | .13            | <b>.36</b>             | .36 | .13            | .12             | <b>.07</b>           | -.01 | .00            | .00             |
| Fritzsche et al. (2002)      | Upper level undergraduate students in a variety of fields   | SDS              | NEO PI-R            | Exp             | 455 | <b>.35</b> | .12            | <b>.29</b>             | .30 | .08            | .09             | <b>.18</b>           | .19  | .03            | .04             |
|                              | <i>Investigative interests</i>                              |                  |                     |                 |     |            |                |                        |     |                |                 |                      |      |                |                 |
|                              | <i>Artistic interests</i>                                   |                  |                     |                 | 455 | <b>.53</b> | .28            | <b>.47</b>             | .50 | .22            | .24             | <b>.18</b>           | .23  | .03            | .05             |
| Hirschi (2008)               | Swiss high school and vocational school students            | AIST-R           | NEO FFI             | Exp             | 492 | <b>.29</b> | .08            | <b>.29</b>             | .28 | .08            | .08             | <b>-.09</b>          | -.03 | .01            | .00             |
|                              | <i>Investigative interests</i>                              |                  |                     |                 |     |            |                |                        |     |                |                 |                      |      |                |                 |
|                              | <i>Artistic interests</i>                                   |                  |                     |                 | 492 | <b>.31</b> | .10            | <b>.27</b>             | .29 | .07            | .08             | <b>.12</b>           | .15  | .01            | .02             |
| Logue et al. (2007)          | Undergraduate business majors in a career exploration class | SII              | PSI                 | Exp             | 164 | <b>.35</b> | .12            | <b>.35</b>             | .35 | .12            | .12             | <b>-.03</b>          | -.01 | .00            | .00             |
|                              | <i>Investigative interests</i>                              |                  |                     |                 |     |            |                |                        |     |                |                 |                      |      |                |                 |
|                              | <i>Artistic interests</i>                                   |                  |                     |                 | 164 | <b>.40</b> | .16            | <b>.40</b>             | .40 | .16            | .16             | <b>.01</b>           | -.01 | .00            | .00             |
| Nauta (2004)                 | Undergraduate students in a variety of fields               | SII              | ACL                 | Int             | 147 | <b>.45</b> | .20            | <b>.44</b>             | .43 | .20            | .18             | <b>.14</b>           | .10  | .02            | .01             |
|                              | <i>Investigative interests</i>                              |                  |                     |                 |     |            |                |                        |     |                |                 |                      |      |                |                 |
|                              | <i>Artistic interests</i>                                   |                  |                     |                 | 147 | <b>.48</b> | .23            | <b>.44</b>             | .40 | .20            | .15             | <b>.29</b>           | .20  | .09            | .04             |
| Nauta (2007)                 | Upper level undergraduate students in a variety of fields   | SII              | ACL                 | Int             | 113 | <b>.21</b> | .05            | <b>.17</b>             | .17 | .03            | .03             | <b>.13</b>           | .12  | .02            | .01             |
|                              | <i>Investigative interests</i>                              |                  |                     |                 |     |            |                |                        |     |                |                 |                      |      |                |                 |
|                              | <i>Artistic interests</i>                                   |                  |                     |                 | 113 | <b>.51</b> | .26            | <b>.50</b>             | .47 | .25            | .21             | <b>.23</b>           | .13  | .05            | .02             |

|                              | Sample description                                                       | Interest measure | Personality measure | Openness aspect | N   | Overall    |                | Profile pattern effect |     |                |                 | Profile level effect |     |                |                 |
|------------------------------|--------------------------------------------------------------------------|------------------|---------------------|-----------------|-----|------------|----------------|------------------------|-----|----------------|-----------------|----------------------|-----|----------------|-----------------|
|                              |                                                                          |                  |                     |                 |     | R          | R <sup>2</sup> | r                      | β   | r <sup>2</sup> | ΔR <sup>2</sup> | r                    | β   | r <sup>2</sup> | ΔR <sup>2</sup> |
| Rottinghaus et al. (2002)    | Undergraduate university students in psychology classes                  | SII              | ACL                 | Int             |     |            |                |                        |     |                |                 |                      |     |                |                 |
|                              | <i>Investigative interests</i>                                           |                  |                     |                 | 365 | <b>.33</b> | .11            | <b>.32</b>             | .30 | .10            | .09             | <b>.14</b>           | .11 | .02            | .01             |
|                              | <i>Artistic interests</i>                                                |                  |                     |                 | 365 | <b>.45</b> | .20            | <b>.44</b>             | .42 | .19            | .17             | <b>.19</b>           | .10 | .04            | .01             |
| Schinka et al. (1997)        | Employed adults with a broad range of educational levels and occupations | SDS              | NEO PI-R            | Exp             |     |            |                |                        |     |                |                 |                      |     |                |                 |
|                              | <i>Investigative interests (Female)</i>                                  |                  |                     |                 | 645 | <b>.44</b> | .19            | <b>.29</b>             | .32 | .08            | .10             | <b>.30</b>           | .33 | .09            | .11             |
|                              | <i>Investigative interests (Male)</i>                                    |                  |                     |                 | 389 | <b>.34</b> | .11            | <b>.32</b>             | .35 | .10            | .11             | <b>.03</b>           | .10 | .00            | .01             |
|                              | <i>Artistic interests (Female)</i>                                       |                  |                     |                 | 645 | <b>.50</b> | .25            | <b>.39</b>             | .43 | .15            | .18             | <b>.26</b>           | .31 | .07            | .10             |
|                              | <i>Artistic interests (Male)</i>                                         |                  |                     |                 | 389 | <b>.42</b> | .17            | <b>.34</b>             | .39 | .12            | .15             | <b>.16</b>           | .24 | .03            | .06             |
| Tokar & Swanson (1995)       | Employed adults with a broad range of educational levels and occupations | SDS              | NEO FFI             | Exp             |     |            |                |                        |     |                |                 |                      |     |                |                 |
|                              | <i>Investigative interests (Female)</i>                                  |                  |                     |                 | 213 | <b>.48</b> | .23            | <b>.38</b>             | .47 | .14            | .20             | <b>.18</b>           | .31 | .03            | .09             |
|                              | <i>Investigative interests (Male)</i>                                    |                  |                     |                 | 146 | <b>.22</b> | .05            | <b>.18</b>             | .21 | .03            | .04             | <b>.08</b>           | .12 | .01            | .01             |
|                              | <i>Artistic interests (Female)</i>                                       |                  |                     |                 | 213 | <b>.57</b> | .32            | <b>.40</b>             | .47 | .16            | .21             | <b>.33</b>           | .41 | .11            | .16             |
|                              | <i>Artistic interests (Male)</i>                                         |                  |                     |                 | 146 | <b>.60</b> | .36            | <b>.49</b>             | .55 | .24            | .29             | <b>.25</b>           | .35 | .06            | .12             |
| Tokar, Vaux & Swanson (1995) | Undergraduate university students in psychology classes                  | SDS              | NEO PI              | Exp             |     |            |                |                        |     |                |                 |                      |     |                |                 |
|                              | <i>Investigative interests (Female)</i>                                  |                  |                     |                 | 102 | <b>.41</b> | .17            | <b>.28</b>             | .35 | .08            | .12             | <b>.23</b>           | .31 | .05            | .09             |
|                              | <i>Investigative interests (Male)</i>                                    |                  |                     |                 | 91  | <b>.29</b> | .09            | <b>.12</b>             | .12 | .01            | .01             | <b>.27</b>           | .27 | .07            | .07             |
|                              | <i>Artistic interests (Female)</i>                                       |                  |                     |                 | 102 | <b>.25</b> | .06            | <b>.17</b>             | .17 | .03            | .03             | <b>.18</b>           | .18 | .03            | .03             |
|                              | <i>Artistic interests (Male)</i>                                         |                  |                     |                 | 91  | <b>.64</b> | .40            | <b>.59</b>             | .60 | .35            | .36             | <b>.20</b>           | .24 | .04            | .06             |

Note. R = multiple correlation for pattern effect and level effect with interest criteria; R<sup>2</sup> = amount of variance accounted for by both effects; β = standardized regression coefficient; ΔR<sup>2</sup> = incremental amount of variance accounted for by one effect over the other; UNIACT = Unisex Edition of ACT Interest Inventory; SDS = Self Directed Search; SDS/BZO95 = Dutch adaptation of Self Directed Search; SII = Strong Interest Inventory; COPS-P = Career Occupational Preference System Interest Inventory; AIST-R = Revised General Interest Structure Test; NEO PI-R = NEO Personality Inventory-Revised; IPIP NEO = International Personality Item Pool equivalent of the NEO PI-R; IPIP Big Five = International Personality Item Pool Big Five markers; ACL = Adjective Check List Big Five Markers; NEO FFI = NEO Five-Factor Inventory; PSI = Personal Style Inventory for College Students; NEO PI = NEO Personality Inventory.

Table S4. Intercorrelation Matrix for Personality and Interest Measures in Study 1

| Scale                                      | 1          | 2          | 3          | 4          | 5          | 6    | 7    | 8    | 9    | 10   | 11   | 12   |
|--------------------------------------------|------------|------------|------------|------------|------------|------|------|------|------|------|------|------|
| <i>NEO Personality Inventory</i>           |            |            |            |            |            |      |      |      |      |      |      |      |
| 1 Emotional Stability                      | .93        |            |            |            |            |      |      |      |      |      |      |      |
| 2 Extraversion                             | .27        | .89        |            |            |            |      |      |      |      |      |      |      |
| 3 Openness                                 | .02        | .34        | .91        |            |            |      |      |      |      |      |      |      |
| 4 Agreeableness                            | .21        | .05        | .02        | .89        |            |      |      |      |      |      |      |      |
| 5 Conscientiousness                        | .47        | .18        | -.13       | .15        | .91        |      |      |      |      |      |      |      |
| <i>Hogan Personality Inventory</i>         |            |            |            |            |            |      |      |      |      |      |      |      |
| 6 Adjustment                               | <b>.72</b> | .16        | .01        | .31        | .24        | .89  |      |      |      |      |      |      |
| 7 Ambition                                 | .53        | <b>.54</b> | .20        | -.12       | .37        | .44  | .86  |      |      |      |      |      |
| 8 Sociability                              | .08        | <b>.63</b> | .38        | -.24       | -.05       | .02  | .46  | .78  |      |      |      |      |
| 9 Intellectance                            | .15        | .22        | <b>.52</b> | -.20       | .05        | .07  | .37  | .43  | .71  |      |      |      |
| 10 School Success                          | .17        | .08        | <b>.24</b> | -.07       | .16        | .15  | .27  | .12  | .33  | .78  |      |      |
| 11 Likeability                             | .27        | .45        | .19        | <b>.47</b> | .08        | .39  | .26  | .17  | .03  | .05  | .75  |      |
| 12 Prudence                                | .23        | -.06       | -.31       | .46        | <b>.42</b> | .34  | .02  | -.37 | -.27 | .04  | .29  | .83  |
| <i>Campbell Interest and Skills Survey</i> |            |            |            |            |            |      |      |      |      |      |      |      |
| 13 Creating                                | -.05       | .20        | .59        | .17        | -.17       | -.07 | .02  | .25  | .24  | .18  | .19  | -.19 |
| 14 Analyzing                               | .05        | -.11       | .05        | -.20       | .12        | .02  | .09  | .03  | .46  | .25  | -.25 | -.05 |
| 15 Art/Design                              | -.01       | .03        | .41        | .08        | -.11       | -.01 | -.01 | .11  | .24  | .07  | .05  | -.17 |
| 16 Performing Arts                         | -.02       | .27        | .42        | .03        | -.13       | -.05 | .16  | .38  | .22  | .05  | .16  | -.20 |
| 17 Writing                                 | .05        | .11        | .46        | -.07       | -.06       | .01  | .13  | .23  | .37  | .29  | .03  | -.20 |
| 18 Fashion                                 | -.11       | .15        | .10        | .19        | -.02       | -.11 | -.13 | .02  | -.14 | -.07 | .16  | .07  |
| 19 Culinary Arts                           | -.01       | .12        | .14        | .10        | .03        | -.02 | .03  | .13  | .12  | .00  | .05  | -.03 |
| 20 Mathematics                             | .06        | -.12       | -.04       | -.18       | .10        | .03  | .08  | .02  | .37  | .23  | -.24 | -.02 |
| 21 Science                                 | .04        | -.09       | .12        | -.20       | .10        | .00  | .10  | .07  | .51  | .19  | -.23 | -.09 |
| 22 Architect                               | -.01       | -.12       | .29        | .01        | -.07       | -.02 | -.06 | .00  | .30  | .04  | -.10 | -.17 |
| 23 Chef                                    | -.10       | -.06       | .24        | .08        | -.08       | -.10 | -.20 | .01  | .06  | .01  | -.07 | -.11 |
| 24 Chemist                                 | .00        | -.25       | .02        | -.14       | .08        | .00  | -.05 | -.11 | .38  | .22  | -.31 | -.03 |
| 25 Commercial Artist                       | -.11       | -.15       | .25        | .21        | -.22       | -.05 | -.29 | -.13 | -.08 | -.04 | .04  | -.06 |
| 26 Computer Programmer                     | -.07       | -.38       | -.42       | -.04       | .10        | -.05 | -.26 | -.38 | -.07 | -.06 | -.30 | .15  |
| 27 Engineer                                | .03        | -.24       | -.03       | -.23       | .06        | .02  | .00  | -.05 | .42  | .17  | -.34 | -.07 |
| 28 Fashion Designer                        | -.08       | .00        | .23        | -.02       | -.18       | -.11 | -.12 | .04  | .00  | -.07 | -.02 | -.18 |
| 29 Liberal Arts Professor                  | -.08       | -.08       | .49        | .18        | -.24       | -.03 | -.16 | .03  | .10  | .19  | .08  | -.14 |
| 30 Medical Researcher                      | .01        | -.16       | .09        | -.19       | .08        | .00  | .05  | .00  | .46  | .29  | -.27 | -.07 |
| 31 Musician                                | -.16       | -.10       | .25        | .09        | -.24       | -.14 | -.22 | .01  | -.10 | -.02 | .01  | -.12 |
| 32 Psychologist                            | -.05       | -.04       | .46        | .12        | -.18       | -.03 | -.09 | .04  | .16  | .17  | .05  | -.15 |
| 33 Restaurant Manager                      | -.07       | .00        | -.04       | .01        | -.02       | -.08 | -.15 | .01  | -.14 | -.10 | -.05 | -.04 |
| 34 Statistician                            | .01        | -.26       | -.06       | -.26       | .06        | .01  | -.02 | -.07 | .34  | .22  | -.35 | -.04 |
| 35 Systems Analyst                         | .01        | -.25       | -.12       | -.29       | .05        | -.02 | -.03 | -.06 | .32  | .11  | -.38 | -.08 |
| 36 Test Pilot                              | .04        | -.11       | -.11       | -.28       | .03        | .02  | .07  | .07  | .39  | .00  | -.27 | -.16 |
| 37 Writer/Editor                           | -.03       | .12        | .43        | .09        | -.22       | -.03 | -.02 | .16  | .04  | .06  | .16  | -.17 |

Note. Reliability coefficients are presented on the diagonal. Cronbach alpha reliabilities for the NEO PI-R were computed based on item level responses from the current sample. As the scoring key for the Hogan Personality Inventory is proprietary, Cronbach alpha reliabilities for the HPI were obtained from the technical manual. For the Campbell Interest and Skills Survey, all reliabilities were obtained from the technical manual, as only scale scores were available. Reliability coefficients for the Orientation and Basic scales are internal consistency estimates. Reliability coefficients for the Occupational scales are test-retest estimates (3-month interval). Boldface values represent convergent validities between corresponding scales across different inventories. Correlations based on pairwise deletion. Pairwise Ns: NEO PI-R and HPI = 484; CISS and NEO PI-R/HPI = 521/520.

(table continues on next page)

Table S4, continued.

|                                            | 13   | 14   | 15   | 16   | 17   | 18   | 19   | 20   | 21   | 22   | 23  | 24   | 25   | 26   | 27   | 28   | 29   | 30   | 31   | 32   | 33   | 34   | 35   | 36   | 37  |  |
|--------------------------------------------|------|------|------|------|------|------|------|------|------|------|-----|------|------|------|------|------|------|------|------|------|------|------|------|------|-----|--|
| <i>Campbell Interest and Skills Survey</i> |      |      |      |      |      |      |      |      |      |      |     |      |      |      |      |      |      |      |      |      |      |      |      |      |     |  |
| 13 Creating                                | .82  |      |      |      |      |      |      |      |      |      |     |      |      |      |      |      |      |      |      |      |      |      |      |      |     |  |
| 14 Analyzing                               | .00  | .93  |      |      |      |      |      |      |      |      |     |      |      |      |      |      |      |      |      |      |      |      |      |      |     |  |
| 15 Art/Design                              | .61  | .14  | .81  |      |      |      |      |      |      |      |     |      |      |      |      |      |      |      |      |      |      |      |      |      |     |  |
| 16 Performing Arts                         | .68  | .00  | .32  | .90  |      |      |      |      |      |      |     |      |      |      |      |      |      |      |      |      |      |      |      |      |     |  |
| 17 Writing                                 | .60  | .21  | .28  | .42  | .84  |      |      |      |      |      |     |      |      |      |      |      |      |      |      |      |      |      |      |      |     |  |
| 18 Fashion                                 | .48  | -.17 | .41  | .29  | .06  | .85  |      |      |      |      |     |      |      |      |      |      |      |      |      |      |      |      |      |      |     |  |
| 19 Culinary Arts                           | .37  | .09  | .20  | .24  | .17  | .31  | .86  |      |      |      |     |      |      |      |      |      |      |      |      |      |      |      |      |      |     |  |
| 20 Mathematics                             | -.06 | .88  | .11  | -.02 | .08  | -.16 | .07  | .89  |      |      |     |      |      |      |      |      |      |      |      |      |      |      |      |      |     |  |
| 21 Science                                 | .06  | .91  | .16  | .05  | .27  | -.15 | .13  | .69  | .88  |      |     |      |      |      |      |      |      |      |      |      |      |      |      |      |     |  |
| 22 Architect                               | .31  | .32  | .79  | .07  | .11  | .13  | .14  | .27  | .35  | .85  |     |      |      |      |      |      |      |      |      |      |      |      |      |      |     |  |
| 23 Chef                                    | .37  | -.01 | .41  | .08  | .03  | .29  | .63  | -.05 | .04  | .42  | .87 |      |      |      |      |      |      |      |      |      |      |      |      |      |     |  |
| 24 Chemist                                 | -.09 | .89  | .11  | -.24 | .09  | -.24 | .10  | .74  | .86  | .41  | .14 | .89  |      |      |      |      |      |      |      |      |      |      |      |      |     |  |
| 25 Commercial Artist                       | .23  | -.39 | .30  | -.04 | .02  | .04  | -.09 | -.40 | -.33 | .34  | .36 | -.18 | .87  |      |      |      |      |      |      |      |      |      |      |      |     |  |
| 26 Computer Programmer                     | -.57 | .42  | -.20 | -.58 | -.54 | -.23 | -.11 | .52  | .31  | .17  | .08 | .58  | -.10 | .92  |      |      |      |      |      |      |      |      |      |      |     |  |
| 27 Engineer                                | -.18 | .85  | .13  | -.19 | .02  | -.32 | -.01 | .83  | .79  | .48  | .07 | .89  | -.13 | .64  | .92  |      |      |      |      |      |      |      |      |      |     |  |
| 28 Fashion Designer                        | .29  | -.31 | .52  | .11  | -.06 | .35  | .01  | -.29 | -.23 | .49  | .40 | -.20 | .61  | -.14 | -.08 | .84  |      |      |      |      |      |      |      |      |     |  |
| 29 Liberal Arts Professor                  | .56  | -.16 | .29  | .30  | .46  | -.03 | -.01 | -.25 | -.11 | .19  | .24 | -.06 | .70  | -.40 | -.14 | .23  | .89  |      |      |      |      |      |      |      |     |  |
| 30 Medical Researcher                      | .01  | .94  | .12  | -.03 | .21  | -.24 | .03  | .79  | .87  | .33  | .04 | .91  | -.28 | .41  | .83  | -.29 | .00  | .88  |      |      |      |      |      |      |     |  |
| 31 Musician                                | .28  | -.40 | .20  | .30  | .02  | .07  | -.08 | -.35 | -.35 | .19  | .28 | -.31 | .76  | -.18 | -.19 | .65  | .58  | -.34 | .84  |      |      |      |      |      |     |  |
| 32 Psychologist                            | .40  | .00  | .21  | .22  | .35  | -.10 | -.07 | -.14 | .04  | .13  | .13 | .08  | .49  | -.31 | -.05 | .06  | .84  | .18  | .27  | .86  |      |      |      |      |     |  |
| 33 Restaurant Manager                      | .08  | -.24 | .09  | -.06 | -.21 | .29  | .63  | -.18 | -.20 | .11  | .75 | -.13 | .14  | .10  | -.14 | .34  | -.13 | -.24 | .21  | -.30 | .86  |      |      |      |     |  |
| 34 Statistician                            | -.18 | .83  | .09  | -.18 | .02  | -.27 | -.02 | .86  | .70  | .38  | .04 | .82  | -.20 | .62  | .91  | -.09 | -.18 | .78  | -.16 | -.14 | -.07 | .90  |      |      |     |  |
| 35 Systems Analyst                         | -.28 | .72  | .11  | -.28 | -.10 | -.27 | -.08 | .75  | .64  | .43  | .08 | .73  | -.19 | .69  | .88  | .06  | -.32 | .67  | -.13 | -.27 | .01  | .86  | .92  |      |     |  |
| 36 Test Pilot                              | -.29 | .58  | -.07 | -.14 | -.11 | -.33 | -.01 | .56  | .55  | .23  | .01 | .59  | -.36 | .55  | .70  | -.19 | -.39 | .55  | -.34 | -.29 | -.08 | .58  | .67  | .83  |     |  |
| 37 Writer/Editor                           | .46  | -.43 | .17  | .36  | .50  | .01  | -.01 | -.57 | -.30 | -.03 | .12 | -.38 | .57  | -.69 | -.45 | .29  | .77  | -.30 | .47  | .69  | -.11 | -.53 | -.56 | -.49 | .88 |  |

Table S5. Intercorrelation Matrices Reanalyzed in Study 2

| <i>Ackerman et al. (1995)</i>          | ES   | Ex   | O    | A    | C    | Int |
|----------------------------------------|------|------|------|------|------|-----|
| Emotional Stability (NEO PI-R)         | --   |      |      |      |      |     |
| Extraversion (NEO PI-R)                | .17  | --   |      |      |      |     |
| Openness (NEO PI-R)                    | -.15 | .39  | --   |      |      |     |
| Agreeableness (NEO PI-R)               | .14  | .13  | .15  | --   |      |     |
| Conscientiousness (NEO PI-R)           | .32  | .01  | -.17 | -.08 | --   |     |
| Investigative interests (UNIACT)       | .05  | -.11 | .25  | .09  | .00  | --  |
| Artistic interests (UNIACT)            | -.26 | .20  | .67  | .20  | -.22 | --  |
| <i>N</i> = 93                          |      |      |      |      |      |     |
| <i>Barrett (2008)</i>                  | ES   | Ex   | O    | A    | C    | Int |
| Emotional Stability (IPIP NEO)         | --   |      |      |      |      |     |
| Extraversion (IPIP NEO)                | .02  | --   |      |      |      |     |
| Openness (IPIP NEO)                    | -.03 | -.04 | --   |      |      |     |
| Agreeableness (IPIP NEO)               | -.17 | .10  | .12  | --   |      |     |
| Conscientiousness (IPIP NEO)           | -.17 | -.10 | .06  | -.01 | --   |     |
| Investigative interests (SDS)          | .16  | -.05 | .19  | .05  | -.03 | --  |
| Artistic interests (SDS)               | -.18 | -.09 | .14  | .10  | .09  | --  |
| <i>N</i> = 194                         |      |      |      |      |      |     |
| <i>De Fruyt &amp; Mervielde (1999)</i> | ES   | Ex   | O    | A    | C    | Int |
| Emotional Stability (NEO PI-R)         | .92  |      |      |      |      |     |
| Extraversion (NEO PI-R)                | .28  | .90  |      |      |      |     |
| Openness (NEO PI-R)                    | -.09 | .18  | .88  |      |      |     |
| Agreeableness (NEO PI-R)               | .19  | .04  | .01  | .90  |      |     |
| Conscientiousness (NEO PI-R)           | .51  | .16  | -.15 | .24  | .92  |     |
| Investigative interests (SDS/BZO95)    | .14  | -.03 | .09  | .05  | .06  | .90 |
| Artistic interests (SDS/BZO95)         | -.11 | .10  | .54  | -.04 | -.20 | .90 |
| <i>N</i> = 335                         |      |      |      |      |      |     |
| <i>Duffy et al. (2009)</i>             | ES   | Ex   | O    | A    | C    | Int |
| Emotional Stability (NEO PI-R)         | --   |      |      |      |      |     |
| Extraversion (NEO PI-R)                | -.05 | --   |      |      |      |     |
| Openness (NEO PI-R)                    | .01  | .41  | --   |      |      |     |
| Agreeableness (NEO PI-R)               | .01  | .33  | .38  | --   |      |     |
| Conscientiousness (NEO PI-R)           | .10  | .15  | .44  | .29  | --   |     |
| Investigative interests (SII)          | .23  | .11  | .09  | .07  | .11  | .74 |
| Artistic interests (SII)               | -.03 | .13  | .59  | .22  | -.06 | .87 |
| <i>N</i> = 282                         |      |      |      |      |      |     |
| <i>Ehrhart &amp; Makransky (2007)</i>  | ES   | Ex   | O    | A    | C    | Int |
| Emotional Stability (IPIP Big Five)    | .88  |      |      |      |      |     |
| Extraversion (IPIP Big Five)           | .24  | .88  |      |      |      |     |
| Openness (IPIP Big Five)               | .15  | .32  | .72  |      |      |     |
| Agreeableness (IPIP Big Five)          | .18  | .27  | .23  | .78  |      |     |
| Conscientiousness (IPIP Big Five)      | -.04 | -.08 | -.07 | .19  | .79  |     |
| Science interests (COPS-P)             | -.06 | -.07 | -.14 | -.07 | -.01 | .94 |
| Art interests (COPS-P)                 | -.11 | .13  | .05  | -.06 | -.09 | .93 |
| <i>N</i> = 335                         |      |      |      |      |      |     |
| <i>Fox (1995)</i>                      | ES   | Ex   | O    | A    | C    | Int |
| Emotional Stability (ACL)              | .70  |      |      |      |      |     |
| Extraversion (ACL)                     | -.02 | .76  |      |      |      |     |
| Openness (ACL)                         | .03  | .43  | .81  |      |      |     |
| Agreeableness (ACL)                    | .05  | .22  | .48  | .83  |      |     |
| Conscientiousness (ACL)                | .12  | .19  | .58  | .55  | .75  |     |
| Investigative interests (SII)          | .06  | .02  | .23  | .06  | .19  | --  |
| Artistic interests (SII)               | -.11 | .00  | .25  | .09  | -.01 | --  |
| <i>N</i> = 147                         |      |      |      |      |      |     |



Table S5, continued.

| <i>Fritzche et al. (2002)</i>        | ES   | Ex   | O    | A    | C    | Int |
|--------------------------------------|------|------|------|------|------|-----|
| Emotional Stability (NEO PI-R)       | .92  |      |      |      |      |     |
| Extraversion (NEO PI-R)              | .29  | .90  |      |      |      |     |
| Openness (NEO PI-R)                  | .07  | .31  | .88  |      |      |     |
| Agreeableness (NEO PI-R)             | .26  | .09  | .13  | .89  |      |     |
| Conscientiousness (NEO PI-R)         | .43  | .21  | -.03 | .23  | .92  |     |
| Investigative interests (SDS)        | .20  | -.02 | .22  | .01  | .13  | .91 |
| Artistic interests (SDS)             | -.01 | .18  | .51  | -.04 | -.10 | .92 |
| <i>N</i> = 455                       |      |      |      |      |      |     |
| <i>Hirschi (2008)</i>                | ES   | Ex   | O    | A    | C    | Int |
| Emotional Stability (German NEO FFI) | .78  |      |      |      |      |     |
| Extraversion (German NEO FFI)        | .39  | .73  |      |      |      |     |
| Openness (German NEO FFI)            | -.02 | .22  | .55  |      |      |     |
| Agreeableness (German NEO FFI)       | .25  | .34  | .10  | .69  |      |     |
| Conscientiousness (German NEO FFI)   | .18  | .10  | .00  | .25  | .78  |     |
| Investigative interests (AIST-R)     | .03  | -.21 | .08  | -.14 | -.02 | .85 |
| Artistic interests (AIST-R)          | -.10 | .08  | .28  | .09  | .00  | .84 |
| <i>N</i> = 492                       |      |      |      |      |      |     |
| <i>Logue et al. (2007)</i>           | ES   | Ex   | O    | A    | C    | Int |
| Emotional Stability (PSI)            | .81  |      |      |      |      |     |
| Extraversion (PSI)                   | .34  | .83  |      |      |      |     |
| Openness (PSI)                       | .23  | .34  | .86  |      |      |     |
| Agreeableness (PSI)                  | .09  | .38  | .27  | .86  |      |     |
| Conscientiousness (PSI)              | .17  | .03  | -.02 | .10  | .79  |     |
| Investigative interests (SII)        | -.08 | -.19 | .20  | .02  | -.04 | --  |
| Artistic interests (SII)             | -.08 | -.07 | .28  | .09  | -.20 | --  |
| <i>N</i> = 164                       |      |      |      |      |      |     |
| <i>Nauta (2004)</i>                  | ES   | Ex   | O    | A    | C    | Int |
| Emotional Stability (ACL)            | --   |      |      |      |      |     |
| Extraversion (ACL)                   | -.05 | --   |      |      |      |     |
| Openness (ACL)                       | .15  | .45  | --   |      |      |     |
| Agreeableness (ACL)                  | .06  | .30  | .53  | --   |      |     |
| Conscientiousness (ACL)              | .18  | .15  | .54  | .61  | --   |     |
| Investigative interests (SII)        | .21  | -.10 | .29  | .00  | .06  | --  |
| Artistic interests (SII)             | .03  | .11  | .41  | .30  | .11  | --  |
| <i>N</i> = 147                       |      |      |      |      |      |     |
| <i>Nauta (2007)</i>                  | ES   | Ex   | O    | A    | C    | Int |
| Emotional Stability (ACL)            | --   |      |      |      |      |     |
| Extraversion (ACL)                   | .10  | --   |      |      |      |     |
| Openness (ACL)                       | -.02 | .46  | --   |      |      |     |
| Agreeableness (ACL)                  | .00  | .29  | .40  | --   |      |     |
| Conscientiousness (ACL)              | .13  | .10  | .42  | .46  | --   |     |
| Investigative interests (SII)        | .03  | .16  | .16  | -.01 | .05  | --  |
| Artistic interests (SII)             | -.24 | .16  | .44  | .25  | .11  | --  |
| <i>N</i> = 113                       |      |      |      |      |      |     |
| <i>Rottinghaus et al. (2002)</i>     | ES   | Ex   | O    | A    | C    | Int |
| Emotional Stability (ACL)            | --   |      |      |      |      |     |
| Extraversion (ACL)                   | -.05 | --   |      |      |      |     |
| Openness (ACL)                       | .01  | .41  | --   |      |      |     |
| Agreeableness (ACL)                  | .01  | .33  | .38  | --   |      |     |
| Conscientiousness (ACL)              | .10  | .15  | .44  | .29  | --   |     |
| Investigative interests (SII)        | .05  | -.03 | .27  | -.02 | .16  | --  |
| Artistic interests (SII)             | -.17 | .16  | .36  | .23  | .00  | --  |
| <i>N</i> = 365                       |      |      |      |      |      |     |

*Table S5, continued.*

| <i>Schinka et al. (1997) – Female</i>             | ES   | Ex   | O    | A    | C    | Int |
|---------------------------------------------------|------|------|------|------|------|-----|
| Emotional Stability (NEO PI-R)                    | --   |      |      |      |      |     |
| Extraversion (NEO PI-R)                           | .33  | --   |      |      |      |     |
| Openness (NEO PI-R)                               | .08  | .44  | --   |      |      |     |
| Agreeableness (NEO PI-R)                          | .32  | .13  | .03  | --   |      |     |
| Conscientiousness (NEO PI-R)                      | .52  | .29  | .06  | .34  | --   |     |
| Investigative interests (SDS)                     | .21  | .17  | .38  | .02  | .17  | --  |
| Artistic interests (SDS)                          | .08  | .27  | .49  | -.04 | .04  | --  |
| <i>N</i> = 645                                    |      |      |      |      |      |     |
| <i>Schinka et al. (1997) – Male</i>               | ES   | Ex   | O    | A    | C    | Int |
| Emotional Stability (NEO PI-R)                    | --   |      |      |      |      |     |
| Extraversion (NEO PI-R)                           | .37  | --   |      |      |      |     |
| Openness (NEO PI-R)                               | -.07 | .30  | --   |      |      |     |
| Agreeableness (NEO PI-R)                          | .25  | .20  | .11  | --   |      |     |
| Conscientiousness (NEO PI-R)                      | .56  | .49  | .03  | .29  | --   |     |
| Investigative interests (SDS)                     | .01  | -.03 | .27  | -.11 | -.05 | --  |
| Artistic interests (SDS)                          | -.03 | .15  | .41  | .02  | -.03 | --  |
| <i>N</i> = 645                                    |      |      |      |      |      |     |
| <i>Tokar &amp; Swanson (1995) – Female</i>        | ES   | Ex   | O    | A    | C    | Int |
| Emotional Stability (NEO FFI)                     | .85  |      |      |      |      |     |
| Extraversion (NEO FFI)                            | .41  | .79  |      |      |      |     |
| Openness (NEO FFI)                                | .15  | .20  | .72  |      |      |     |
| Agreeableness (NEO FFI)                           | .34  | .30  | .00  | .70  |      |     |
| Conscientiousness (NEO FFI)                       | .26  | .25  | -.16 | .23  | .83  |     |
| Investigative interests (SDS)                     | .04  | .03  | .45  | -.03 | .06  | --  |
| Artistic interests (SDS)                          | .13  | .28  | .53  | .12  | -.07 | --  |
| <i>N</i> = 213                                    |      |      |      |      |      |     |
| <i>Tokar &amp; Swanson (1995) – Male</i>          | ES   | Ex   | O    | A    | C    | Int |
| Emotional Stability (NEO FFI)                     | .86  |      |      |      |      |     |
| Extraversion (NEO FFI)                            | .26  | .75  |      |      |      |     |
| Openness (NEO FFI)                                | -.14 | .21  | .76  |      |      |     |
| Agreeableness (NEO FFI)                           | .21  | .05  | .05  | .72  |      |     |
| Conscientiousness (NEO FFI)                       | .41  | .17  | -.09 | .17  | .84  |     |
| Investigative interests (SDS)                     | -.01 | -.02 | .20  | .03  | .02  | --  |
| Artistic interests (SDS)                          | -.15 | .22  | .57  | .05  | .01  | --  |
| <i>N</i> = 146                                    |      |      |      |      |      |     |
| <i>Tokar, Vaux, &amp; Swanson (1995) – Female</i> | ES   | Ex   | O    | A    | C    | Int |
| Emotional Stability (NEO PI)                      | .88  |      |      |      |      |     |
| Extraversion (NEO PI)                             | .25  | .90  |      |      |      |     |
| Openness (NEO PI)                                 | .01  | .45  | .88  |      |      |     |
| Agreeableness (NEO PI)                            | .18  | .38  | .28  | .79  |      |     |
| Conscientiousness (NEO PI)                        | .13  | .42  | .31  | .15  | .88  |     |
| Investigative interests (SDS)                     | .06  | .08  | .26  | .11  | .08  | --  |
| Artistic interests (SDS)                          | .01  | .12  | .24  | .07  | .14  | --  |
| <i>N</i> = 102                                    |      |      |      |      |      |     |
| <i>Tokar, Vaux, &amp; Swanson (1995) – Male</i>   | ES   | Ex   | O    | A    | C    | Int |
| Emotional Stability (NEO PI)                      | .91  |      |      |      |      |     |
| Extraversion (NEO PI)                             | .39  | .87  |      |      |      |     |
| Openness (NEO PI)                                 | -.01 | .39  | .90  |      |      |     |
| Agreeableness (NEO PI)                            | .20  | .46  | .33  | .70  |      |     |
| Conscientiousness (NEO PI)                        | .43  | .25  | -.10 | .07  | .86  |     |
| Investigative interests (SDS)                     | .07  | .13  | .26  | .13  | -.10 | --  |
| Artistic interests (SDS)                          | -.11 | .21  | .60  | .20  | -.26 | --  |
| <i>N</i> = 91                                     |      |      |      |      |      |     |

*Note.* ES = Emotional Stability; Ex = Extraversion; O = Openness; A = Agreeableness; C = Conscientiousness; Int = Interest scale alpha coefficients; NEO PI-R = NEO Personality Inventory-Revised; UNIACT = Unisex Edition of ACT Interest Inventory; IPIP NEO = International Personality Item Pool equivalent of the NEO PI-R; SDS = Self Directed Search; SDS/BZO95 = Dutch adaptation of Self Directed Search; SII = Strong Interest Inventory; IPIP Big Five = International Personality Item Pool Big Five markers; COPS-P = Career Occupational Preference System Interest Inventory; ACL = Adjective Check List Big Five Markers; NEO FFI = NEO Five-Factor Inventory; AIST-R = Revised General Interest Structure Test; PSI = Personal Style Inventory for College Students; NEO PI = NEO Personality Inventory; Values on the diagonals are alpha coefficients.

### References for Studies Reanalyzed for Study 2

- Ackerman, P. L., Kanfer, R., & Goff, M. (1995). Cognitive and noncognitive determinants and consequences of complex skill acquisition. *Journal of Experimental Psychology: Applied*, 1(4), 270–304. <http://doi.org/10/bbmzgr>
- Barrett, E. A. (2009, May). *Looking beyond the five-factor model: College self-efficacy as a moderator of the relationship between Tellegen's Big Three model of personality and Holland's model of vocational interest types* (Master's thesis). University of Wisconsin-Oshkosh, Oshkosh, WI.
- De Fruyt, F., & Mervielde, I. (1999). RIASEC types and Big Five traits as predictors of employment status and nature of employment. *Personnel Psychology*, 52(3), 701–727. <http://doi.org/10/cqtwgp>
- Duffy, R. D., Borges, N. J., & Hartung, P. J. (2009). Personality, vocational interests, and work values of medical students. *Journal of Career Assessment*, 17(2), 189–200. <http://doi.org/10/fdckdb>
- Ehrhart, K. H., & Makransky, G. (2007). Testing vocational interests and personality as predictors of person-vocation and person-job fit. *Journal of Career Assessment*, 15(2), 206–226. <http://doi.org/10/d2hgf2>
- Fox, M. L. (1995). *Assessment of personality and vocational interests: Redundant versus complementary* (Doctoral dissertation). Iowa State University, Ames, IA.
- Fritzsche, B. A., McIntire, S. A., & Yost, A. P. (2002). Holland type as a moderator of personality–performance predictions. *Journal of Vocational Behavior*, 60(3), 422–436. <http://doi.org/10/dtn84h>
- Hirschi, A. (2008). Personality complexes in adolescence: Traits, interests, work values, and self-evaluations. *Personality and Individual Differences*, 45(8), 716–721. <http://doi.org/10/dtjv4>
- Logue, C. T., Lounsbury, J. W., Gupta, A., & Leong, F. T. L. (2007). Vocational interest themes and personality traits in relation to college major satisfaction of business students. *Journal of Career Development*, 33(3), 269–295. <http://doi.org/10/fn3qpt>
- Nauta, M. M. (2004). Self-efficacy as a mediator of the relationships between personality factors and career interests. *Journal of Career Assessment*, 12(4), 381–394. <http://doi.org/10/d3cv7z>
- Nauta, M. M. (2007). Career interests, self-efficacy, and personality as antecedents of career exploration. *Journal of Career Assessment*, 15(2), 162–180. <http://doi.org/10/cs85bj>
- Rottinghaus, P. J., Lindley, L. D., Green, M. A., & Borgen, F. H. (2002). Educational aspirations: The contribution of personality, self-efficacy, and interests. *Journal of Vocational Behavior*, 61(1), 1–19. <http://doi.org/10/b42c3m>
- Schinka, J. A., Dye, D., A., & Curtiss, G. (1997). Correspondence between five-factor and RIASEC models of personality. *Journal of Personality Assessment*, 68(2), 355–368. <http://doi.org/10/c358dk>
- Tokar, D. M., & Swanson, J. L. (1995). Evaluation of the correspondence between Holland's vocational personality typology and the Five-Factor Model of personality. *Journal of Vocational Behavior*, 46(1), 89–108. <http://doi.org/10/drkhxs>
- Tokar, D. M., Vaux, A., & Swanson, J. L. (1995). Dimensions relating Holland's vocational personality typology and the Five-Factor Model. *Journal of Career Assessment*, 3(1), 57–74. <http://doi.org/10/dzdzbr>
